# Supplementary material
Source: Research Square preprint supplement (doi:10.21203/rs.3.rs-9016216/v1)
Supplement: Supplementary file 1 [file 953c60e6d957d99dcae0ab3e.docx]

## TABLES

| Table .  Demographic, preoperative, and intraoperative characteristics of ROSO patients (n = 46). All variables are reported as counts (percentage). Age (years), laterality (left or right), time to ROSO (days) are reported as mean (SD). |
| --- |
| | Age | 53.8 ± 15.2 | | --- | --- | | Gender | 28 (60.9) | | Ethnicity |  | | White | 15 (32.6) | | Asian | 11 (23.9) | | Black | 12 (26.1) | | Mixed | 1 (2.2) | | Other | 7 (15.2) | | Laterality (Right) | 27 (58.7) | | Past Medical History | | | Type 1 DM | 6 (13.0) | | Type 2 DM | 17 (37.0) | | Hypertension | 25 (54.3) | | Dyslipidaemia | 21 (45.7) | | Previous vascular occlusive episode (stroke, TIA, MI) | 14 (30.4) | | Chronic Kidney Disease | 3 (6.5) | | Other | 15 (32.6) | | Primary pathology of RD |  | | Rhegmatogenous | 21 (45.7) | | Tractional | 15 (32.6) | | Combined | 4 (8.7) | | Traumatic | 2 (4.3) | | Giant Retinal Tear | 1 (2.2) | | Other | 3 (6.5) | | Time to ROSO | 246 (201) | | Postoperative PVR | 13 (28.3) | | Lens status |  | | Pseudophakic prior to primary repair | 11 (23.9) | | Cataract removal at the time of primary repair | 7 (15.2) | | Cataract removal at the time of ROSOε | 19 (41.3) | |
| Abbreviations: DM; diabetes mellitus, TIA; transient ischaemic attack, MI; myocardial infarction, RD; retinal detachment, ROSO; removal of silicone oil, PVR; proliferative vitreoretinopathy. |

| Table 2.  A Modified Global Complication Score (MGCS) is calculated to provide a single global figure for studies employing the Complications of Retinal Detachment Surgery Severity Classification.[1] This includes calculating the ‘*total complication score*’ for our cohort and dividing by the ‘*maximum complication score*’ for our cohort. The score is unique to each study cohort. The ‘loss of visual acuity attributable to surgery’ item had duplicates removed to ensure a representative global figure for complications was calculated. |
| --- |
| | Complication | CORDS Severity Score | Total Frequency of Cx | Total Cx Score | Maximal  Cx Score | | --- | --- | --- | --- | --- | | **General Postoperative** | | | | | | Early raised IOP (Self-Resolving) | 2 | 2 | 4 | 92 | | Early hypotony (Self-Resolving) | 2 | 2 | 4 | 92 | | Persistent localised SRF (Peripheral, No Progress) | 3 | 4 | 12 | 138 | | Persistently raised IOP (Requires Drops) | 4 | 10 | 40 | 184 | | Macular Oedema | 4 | 11 | 44 | 184 | | SCH (Macula-Sparring & Non-Kissing) | 5 | 1 | 5 | 230 | | Loss of VA (Due to Surgery, Moderate)* | 6 | 4 | 24 | 276 | | Persistent hypotony (IOP<5mmHg, No Folds) | 6 | 2 | 12 | 276 | | Macular Hole Formation | 6 | 2 | 12 | 276 | | Corneal Decompensation | 7 | 5 | 35 | 322 | | Persistently raised IOP (Requires Surgery) | 7 | 3 | 21 | 322 | | Retinal Re-detachment (PVR) | 7 | 4 | 28 | 322 | | Loss of VA (Due to Surgery, Severe)* | 8 | 8 | 64 | 368 | | Phthisis | 10 | 2 | 20 | 460 | | **Total** | **77** | **60** | **325** | **3542** | | **Pars Plana Vitrectomy (PPV)-Specific Complications** | | | | | | Anterior Displacement of Tamponade Agent (SO) | 3 | 11 | 33 | 138 | | Emulsification of Tamponade Agents (SO) | 4 | 1 | 4 | 184 | | Non-Infectious Uveitis | 4 | 6 | 24 | 184 | | Incomplete Removal of Tamponade Agent (SO) | 5 | 9 | 45 | 230 | | Retinal Re-detachment (New Tear) | 7 | 1 | 7 | 322 | | **Total** | **23** | **28** | **113** | **1058** | | **Modified Global Complication Score** (MGCS, %) | | | | | | (Total Cx score) / (Total Max Score) * 100 | [(325+113) / (3542+1058)] * 100 | | **9.52%** | | |
| Abbreviations: Cx; complications, CORDS; Complications of Retinal Detachment Surgery; IOP; intraocular pressure, SRF; subretinal fluid, SCH; suprachoroidal haemorrhage, VA; visual acuity, mmHg; millimetres of mercury, SO; silicone oil. |
